# Supplementary material for: Trichoderma: The Current Status of Its Application in Agriculture for the Biocontrol of Fungal Phytopathogens and Stimulation of Plant Growth
Source: MDPI journal article supplement (doi:10.3390/ijms23042329), 2022-02-19
Supplement: s1 [file s1]

**Table S1.** *Trichoderma*-based commercialized biocontrol agents (BCAs) against fungal phytopathogens and their application in specific plant crops.

| Name of products                                                    | Species                                                            | Strain     | Registered in                                                       | Protected crops                                                                                                                            | Target pathogens                                                                                                                                                                                     |
|---------------------------------------------------------------------|--------------------------------------------------------------------|------------|---------------------------------------------------------------------|--------------------------------------------------------------------------------------------------------------------------------------------|------------------------------------------------------------------------------------------------------------------------------------------------------------------------------------------------------|
| <b>Anushka</b>                                                      | <i>T. viride</i>                                                   |            | India <sup>a</sup>                                                  | permitted for use on all crops                                                                                                             | <i>Phytophthora</i> spp., <i>Rhizoctonia</i> spp.,<br><i>Sclerotinia</i> spp.                                                                                                                        |
| <b>BF20.001</b>                                                     | <i>T. asperellum</i>                                               | ICC 012    | Brazil <sup>b</sup>                                                 | permitted for use on all crops                                                                                                             | <i>Rhizoctonia solani</i> , <i>Colletotrichum</i> spp.,<br><i>Sclerotinia sclerotiorum</i>                                                                                                           |
| <b>Bhoomika</b>                                                     | <i>T. viride</i>                                                   | TNAU-TV-1  | India <sup>a</sup>                                                  | all crops and trees                                                                                                                        | <i>Phytophthora</i> spp., <i>Rhizoctonia</i> spp.,<br><i>Sclerotinia</i> spp.                                                                                                                        |
| <b>Binab T</b> (Binab T Wettable Powder<br>Biorational Fungicide)   | <i>T. polysporum</i>                                               | ATCC 20475 | USA <sup>c</sup>                                                    | forest trees, ornamental shade                                                                                                             | <i>Poria carbonica</i> ,                                                                                                                                                                             |
|                                                                     | <i>T. viride</i>                                                   | ATCC 20476 |                                                                     | trees, ornamental trees                                                                                                                    | <i>Lentinus lepideus</i>                                                                                                                                                                             |
| <b>Bio Zenon</b>                                                    | <i>T. harzianum</i>                                                | CCT 7589   | Brazil <sup>b</sup>                                                 | permitted for use on all crops                                                                                                             | <i>Rhizoctonia solani</i>                                                                                                                                                                            |
| <b>Bio-Fit</b>                                                      | <i>T. harzianum</i><br><i>Trichoderma</i> spp.<br><i>T. viride</i> |            | Chile <sup>d</sup>                                                  | permitted for use on all crops                                                                                                             | <i>Fusarium</i> spp., <i>Phytophthora</i> spp.,<br><i>Pythium</i> spp., <i>Rhizoctonia</i> spp.,<br><i>Verticillium</i> spp.                                                                         |
| <b>Biofort</b>                                                      | <i>T. viride</i>                                                   |            | India <sup>a</sup>                                                  | permitted for use on all crops                                                                                                             | <i>Phytophthora</i> spp., <i>Rhizoctonia</i> spp.,<br><i>Sclerotinia</i> spp.                                                                                                                        |
| <b>Bio-Hulk</b>                                                     | <i>T. asperellum</i>                                               | BV-10      | Brazil <sup>b</sup>                                                 | permitted for use on all crops                                                                                                             | <i>Rhizoctonia solani</i>                                                                                                                                                                            |
| <b>Bioten WP</b> (Bio-Tam 2.0, Tenet<br>WP, Remedier WP, Tenet T&O) | <i>T. asperellum</i>                                               | ICC 012    | USA <sup>c</sup> , Canada <sup>f</sup> ,<br>EU Members <sup>e</sup> | strawberry, pepper, tomato,<br>ornamental plants, grape vine,                                                                              | <i>Pythium</i> spp., <i>Rhizoctonia</i> spp.,<br><i>Phytophthora</i> spp., <i>Phoma</i> spp.,<br><i>Verticillium</i> spp., <i>Fusarium</i> spp.,<br><i>Sclerotinia</i> spp., <i>Armillaria</i> spp., |
|                                                                     | <i>T. gamsii</i>                                                   | ICC 080    |                                                                     | cereal grains, cole crops, berries,<br>cucurbits, leafy vegetables, legume<br>vegetables, herbs, onions, citrus,<br>greenhouse and nursery | <i>Rosellinia</i> spp., <i>Sclerotium rolfsii</i> ,<br><i>Phaeomoniella chlamydospora</i>                                                                                                            |
| <b>Bio-Traz</b>                                                     | <i>T. harzianum</i>                                                |            | Chile <sup>d</sup>                                                  | permitted for use on all crops                                                                                                             | <i>Botrytis cinerea</i>                                                                                                                                                                              |
| <b>Bora HC</b>                                                      | <i>T. harzianum</i>                                                | KRL-AG2    | Canada <sup>f</sup>                                                 | greenhouse crops, greenhouse<br>vegetables, outdoor nursery<br>plants, agricultural field crops,<br>strawberry, lettuce, geranium          | <i>Pythium</i> spp., <i>Rhizoctonia</i> spp.,<br><i>Fusarium</i> spp.                                                                                                                                |
| <b>Bora WP</b>                                                      | <i>T. harzianum</i>                                                | KRL-AG2    | Canada <sup>f</sup>                                                 | greenhouse crops, outdoor nursery<br>plants, greenhouse transplants                                                                        | <i>Pythium</i> spp., <i>Rhizoctonia</i> spp.,<br><i>Fusarium</i> spp., <i>Botrytis cinerea</i>                                                                                                       |

Table S1. Continuation.

| Name of products                                                                                                                                                                                                                                                                                                                                                                              | Species                                                 | Strain     | Registered in                          | Protected crops                                                                                                                                                                                                                                                                               | Target pathogens                                                                                                                                                              |
|-----------------------------------------------------------------------------------------------------------------------------------------------------------------------------------------------------------------------------------------------------------------------------------------------------------------------------------------------------------------------------------------------|---------------------------------------------------------|------------|----------------------------------------|-----------------------------------------------------------------------------------------------------------------------------------------------------------------------------------------------------------------------------------------------------------------------------------------------|-------------------------------------------------------------------------------------------------------------------------------------------------------------------------------|
| <b>BW 240 G Biological Fungicide</b><br>(Rootshield Plus Granules, Rootshield Plus Granules Biological Fungicide, Rootshield Plus+ G, Rootshield Plus+ G Biological Fungicide, Rootshield Plus+ Granules, Rootshield Plus+ Granules Biological Fungicide, Turfshield Plus G, Turfshield Plus G Biological Fungicide, Turfshield Plus Granules, Turfshield Plus Granules Biological Fungicide) | <i>T. virens</i>                                        | G-41       | USA <sup>c</sup>                       | celery, cherries, chervil, chestnut, citrus, cole crops, corn, cotton, cucumber, eggplant, endive, fennel, fruiting vegetables, garlic, grapefruit, grapes, greens, herbs, leafy vegetables, lentils, lettuce, nut trees, oak, oranges, ornamental plants, onions, parsley, peppers, plantain | <i>Fusarium</i> spp., <i>Phytophthora</i> spp., <i>Pythium</i> spp., <i>Rhizoctonia</i> spp., <i>Thielaviopsis</i> spp.                                                       |
|                                                                                                                                                                                                                                                                                                                                                                                               | <i>T. afroharzianum</i> (formerly <i>T. harzianum</i> ) | T-22       |                                        |                                                                                                                                                                                                                                                                                               |                                                                                                                                                                               |
| <b>BW 240 WP Biological Fungicide</b><br>(Rootshield Plus, Rootshield Plus WP Biological Fungicide, Rootshield Plus+ WP Biological Fungicide, Rootshield Plus Wettable Powder, Rootshield Plus WP, Rootshield Plus+ WP, Turfshield Plus WP, Turfshield Plus WP Biological Fungicide)                                                                                                          | <i>T. virens</i>                                        | G-41       | USA <sup>c</sup> , Canada <sup>f</sup> | berries and small fruits, bulb vegetables, cucurbit vegetables, fruiting vegetables, leafy vegetables, cereal grains, citrus fruits, asparagus, herbs and spices, hydroponic plants                                                                                                           | <i>Pythium</i> spp., <i>Phytophthora</i> spp., <i>Rhizoctonia</i> spp., <i>Fusarium</i> spp., <i>Cylindrocladium</i> spp., <i>Sclerotinia</i> spp., <i>Thielaviopsis</i> spp. |
|                                                                                                                                                                                                                                                                                                                                                                                               | <i>T. afroharzianum</i> (formerly <i>T. harzianum</i> ) | T-22       |                                        |                                                                                                                                                                                                                                                                                               |                                                                                                                                                                               |
| <b>Criyagen</b>                                                                                                                                                                                                                                                                                                                                                                               | <i>T. viride</i>                                        |            | India <sup>a</sup>                     | permitted for use on all crops                                                                                                                                                                                                                                                                | <i>Botrytis cinerea</i> , <i>Fusarium</i> spp., <i>Ganoderma</i> spp., <i>Sclerotinia</i> spp.                                                                                |
| <b>Daytona</b>                                                                                                                                                                                                                                                                                                                                                                                | <i>T. harzianum</i>                                     | ESALQ-1306 | Brazil <sup>b</sup>                    | beans, strawberry, soybean                                                                                                                                                                                                                                                                    | <i>Fusarium solani</i> f.sp. <i>phaseoli</i> , <i>Rhizoctonia solani</i> , <i>Sclerotinia sclerotiorum</i>                                                                    |
| <b>Derma HL</b>                                                                                                                                                                                                                                                                                                                                                                               | <i>T. harzianum</i>                                     | IIHR Th-2  | India <sup>a</sup>                     | permitted for use on all crops                                                                                                                                                                                                                                                                | <i>Alternaria</i> spp., <i>Cercospora</i> spp., <i>Fusarium</i> spp., <i>Phytophthora</i> spp., <i>Rhizoctonia</i> spp., <i>Sclerotinia</i> spp., <i>Verticillium</i> spp.    |

Table S1. Continuation.

| Name of products             | Species              | Strain    | Registered in                          | Protected crops                                                                                                                       | Target pathogens                                                                                                                                                                    |
|------------------------------|----------------------|-----------|----------------------------------------|---------------------------------------------------------------------------------------------------------------------------------------|-------------------------------------------------------------------------------------------------------------------------------------------------------------------------------------|
| <b>Derma WHP</b>             | <i>T. harzianum</i>  | IIHR Th-2 | India <sup>a</sup>                     | permitted for use on all crops                                                                                                        | <i>Alternaria</i> spp., <i>Cercospora</i> spp.,<br><i>Fusarium</i> spp., <i>Phytophthora</i> spp.,<br><i>Rhizoctonia</i> spp., <i>Sclerotinia</i> spp.,<br><i>Verticillium</i> spp. |
| <b>Ecohume GR</b>            | <i>T. viride</i>     |           | India <sup>a</sup>                     | permitted for use on all crops                                                                                                        | <i>Alternaria</i> spp., <i>Ascochyta</i> spp.,<br><i>Cercospora</i> spp., <i>Fusarium</i> spp.,<br><i>Verticillium</i> spp.                                                         |
| <b>Ecotrich WP</b>           | <i>T. harzianum</i>  | IBLF006   | Brazil <sup>b</sup>                    | permitted for use on all crops                                                                                                        | <i>Rhizoctonia solani</i>                                                                                                                                                           |
| <b>ESQUIVE WP</b>            | <i>T. atroviride</i> | I-1237    | EU Members <sup>c</sup>                | grapevine pruning, grapevine<br>nursery                                                                                               | wood decay diseases                                                                                                                                                                 |
| <b>G-41 Technical</b>        | <i>T. virens</i>     | G-41      | USA <sup>c</sup> , Canada <sup>f</sup> | various agricultural, greenhouse<br>and nursery crops, plants in<br>residential settings (e.g.,<br>vegetables, fruit and ornamentals) | <i>Rhizoctonia</i> spp., <i>Fusarium</i> spp.                                                                                                                                       |
| <b>Gaia Bio</b> (Biagro GEB) | <i>T. harzianum</i>  | CCT 7589  | Brazil <sup>b</sup>                    | permitted for use on all crops                                                                                                        | <i>Rhizoctonia solani</i>                                                                                                                                                           |
| <b>Hariz</b>                 | <i>T. harzianum</i>  | IIHR Th-2 | India <sup>a</sup>                     | permitted for use on all crops                                                                                                        | <i>Botrytis</i> spp., <i>Fusarium</i> spp.,<br><i>Penicillium</i> spp., <i>Pythium</i> spp.                                                                                         |
| <b>Incept</b>                | <i>T. hamatum</i>    | TH382     | USA <sup>c</sup>                       | compost, greenhouse soils,<br>ornamental plants, potting soil,<br>vegetable crops                                                     | <i>Botrytis</i> spp., <i>Fusarium</i> spp.,<br><i>Phytophthora</i> spp., <i>Pythium</i> spp.,<br><i>Rhizoctonia</i> spp., <i>Sclerotinia</i> spp.,<br><i>Thielaviopsis</i> spp.     |
| <b>Jaivika</b>               | <i>T. viride</i>     |           | India <sup>a</sup>                     | permitted for use on all crops                                                                                                        | <i>Botrytis cinerea</i> , <i>Botrytis</i> spp., <i>Fusarium</i><br>spp., <i>Pythium</i> spp., <i>Rhizoctonia</i> spp.,<br><i>Sclerotinia</i> spp., <i>Sclerotium</i> spp.           |
| <b>Monitor</b>               | <i>T. viride</i>     |           | India <sup>a</sup>                     | permitted for use on all crops                                                                                                        | <i>Alternaria</i> spp., <i>Colletotrichum</i> spp.,<br><i>Fusarium</i> spp., <i>Phytophthora</i> spp.,<br><i>Rhizoctonia</i> spp., <i>Sclerotium</i> spp.,<br><i>Pythium</i> spp.   |
| <b>Natucontrol</b>           | <i>T. harzianum</i>  |           | Brazil <sup>b</sup>                    | permitted for use on all crops                                                                                                        | <i>Rhizoctonia solani</i> , <i>Sclerotinia</i><br><i>sclerotiorum</i> , <i>Fusarium solani</i>                                                                                      |

Table S1. Continuation.

| Name of products   | Species                                     | Strain               | Registered in                                        | Protected crops                                                                                       | Target pathogens                                                                                                                                                            |
|--------------------|---------------------------------------------|----------------------|------------------------------------------------------|-------------------------------------------------------------------------------------------------------|-----------------------------------------------------------------------------------------------------------------------------------------------------------------------------|
| Neemoderma         | <i>T. viride</i>                            | TNAU-TV-1            | India <sup>a</sup>                                   | permitted for use on all crops                                                                        | <i>Botrytis cinerea</i> , <i>Fusarium</i> spp.,<br><i>Ganoderma</i> spp., <i>Pythium</i> spp.,<br><i>Rhizoctonia</i> spp., <i>Sclerotinia</i> spp.,<br><i>Ustilago</i> spp. |
| Niprot             | <i>T. viride</i>                            |                      | India <sup>a</sup>                                   | permitted for use on all crops                                                                        | fungus diseases                                                                                                                                                             |
| Organic WP         | <i>T. asperellum</i>                        | URM 5911             | Brazil <sup>b</sup>                                  | permitted for use on all crops                                                                        | <i>Fusarium solani</i> f.sp. <i>phaseoli</i> ,<br><i>Rhizoctonia solani</i>                                                                                                 |
| Pardella           | <i>T. asperellum</i><br><i>T. harzianum</i> | URM 8120<br>URM 8119 | Brazil <sup>b</sup>                                  | permitted for use on all crops                                                                        | <i>Rhizoctonia solani</i> , <i>Sclerotinia</i><br><i>sclerotiorum</i> , <i>Colletotrichum</i> spp.                                                                          |
| Peak Trico         | <i>T. viride</i>                            |                      | India <sup>a</sup>                                   | permitted for use on all crops                                                                        | <i>Armillaria</i> spp., <i>Fusarium</i> spp.,<br><i>Ganoderma</i> spp., <i>Pythium</i> spp.                                                                                 |
| Peak Trico-H       | <i>T. viride</i>                            | IIHR Th-2            | India <sup>a</sup>                                   | permitted for use on all crops                                                                        | <i>Armillaria</i> spp., <i>Fusarium</i> spp.,<br><i>Ganoderma</i> spp., <i>Pythium</i> spp.                                                                                 |
| Predatox           | <i>T. harzianum</i>                         | IBLF006              | Brazil <sup>b</sup>                                  | lettuce, soybean, beans                                                                               | <i>Rhizoctonia solani</i> , <i>Sclerotinia</i><br><i>sclerotiorum</i>                                                                                                       |
| Quality            | <i>T. asperellum</i>                        | URM 5911             | Brazil <sup>b</sup>                                  | permitted for use on all crops                                                                        | <i>Fusarium</i> spp., <i>Rhizoctonia</i> spp.                                                                                                                               |
| Rizoderma          | <i>T. harzianum</i>                         | IBLF006              | Brazil <sup>b</sup>                                  | permitted for use on all crops                                                                        | <i>Rhizoctonia solani</i> , <i>Sclerotinia</i><br><i>sclerotiorum</i>                                                                                                       |
| ROM-Tricho         | <i>T. viride</i>                            |                      | India <sup>a</sup>                                   | pepper, cardamon, ginger,<br>turmeric, banana, cabbage, potato,<br>pomegranate and other crops        | <i>Fusarium</i> spp., <i>Phytophthora</i> spp.,<br><i>Pythium</i> spp., <i>Sclerotium</i> spp.                                                                              |
| ROM-Trypae mixture | <i>T. viride</i>                            |                      | India <sup>a</sup>                                   | banana, cardamon, pepper,<br>turmeric, ginger, pomegranate, all<br>types of vegetable and other crops | <i>Fusarium</i> spp., <i>Pythium</i> spp.,<br><i>Phytophthora</i> spp.                                                                                                      |
| Sentinel           | <i>T. atroviride</i>                        | LU132                | New Zealand <sup>g</sup> ,<br>Australia <sup>h</sup> | grapevines, tomatoes                                                                                  | <i>Botrytis cinerea</i>                                                                                                                                                     |
| Sharad-Tricho      | <i>T. viride</i>                            | IIHR-TV-5            | India <sup>a</sup>                                   | wide range of crops                                                                                   | <i>Phytophthora</i> spp., <i>Pythium</i> spp.,<br><i>Rhizoctonia</i> spp.                                                                                                   |
| Shocker            | <i>T. harzianum</i>                         | CPQBA 040-11         | Brazil <sup>b</sup>                                  | beans, soybean                                                                                        | <i>Rhizoctonia solani</i> , <i>Sclerotinia</i><br><i>sclerotiorum</i>                                                                                                       |

Table S1. Continuation.

| Name of products                                                                                                                                                                                                                                                                                         | Species                                                       | Strain               | Registered in                                 | Protected crops                                                                                                                                                          | Target pathogens                                                                                                                 |
|----------------------------------------------------------------------------------------------------------------------------------------------------------------------------------------------------------------------------------------------------------------------------------------------------------|---------------------------------------------------------------|----------------------|-----------------------------------------------|--------------------------------------------------------------------------------------------------------------------------------------------------------------------------|----------------------------------------------------------------------------------------------------------------------------------|
| <b>Stimucontrol</b>                                                                                                                                                                                                                                                                                      | <i>T. harzianum</i>                                           | CCT 7589             | Brazil <sup>b</sup>                           | permitted for use on all crops                                                                                                                                           | <i>Rhizoctonia solani</i> , <i>Sclerotinia sclerotiorum</i>                                                                      |
| <b>Stimucontrol Evolution</b>                                                                                                                                                                                                                                                                            | <i>T. harzianum</i>                                           | CCT 7589             | Brazil <sup>b</sup>                           | permitted for use on all crops                                                                                                                                           | <i>Rhizoctonia solani</i> , <i>Sclerotinia sclerotiorum</i>                                                                      |
| <b>Sustain</b>                                                                                                                                                                                                                                                                                           | <i>T. asperellum</i>                                          |                      | Uganda <sup>i</sup>                           | permitted for use on all crops                                                                                                                                           | <i>Fusarium</i> spp.                                                                                                             |
| <b>T-22 G Biological Fungicide</b><br>(Rootshield Granules Biological Fungicide, T-22 G Granules Biological Fungicide)                                                                                                                                                                                   | <i>T. afroharzianum</i><br>(formerly<br><i>T. harzianum</i> ) | T-22                 | USA <sup>c</sup>                              | agricultural field crops, fruiting vegetables, leafy vegetables, fruits, ornamental plants                                                                               | <i>Cylindrocladium</i> spp., <i>Fusarium</i> spp.,<br><i>Pythium</i> spp., <i>Rhizoctonia</i> spp.,<br><i>Thielaviopsis</i> spp. |
| <b>T-22 Technical</b>                                                                                                                                                                                                                                                                                    | <i>T. afroharzianum</i><br>(formerly<br><i>T. harzianum</i> ) | T-22                 | USA <sup>c</sup>                              | permitted for use on all crops                                                                                                                                           | <i>Fusarium</i> spp., <i>Pythium</i> spp.,<br><i>Rhizoctonia</i> spp., <i>Thielaviopsis</i> spp.                                 |
| <b>T-22 WP Biological Fungicide</b><br>(Plantshield HC Biological Fungicide, Root Guardian, Rootshield AG, Rootshield AG Biological Fungicide, Rootshield Home and Garden Biological Fungicide, Rootshield Seed Treatment, Rootshield Seed Treatment Biological Fungicide, T-22 HC Biological Fungicide) | <i>T. afroharzianum</i><br>(formerly<br><i>T. harzianum</i> ) | T-22                 | USA <sup>c</sup>                              | almonds, bananas, beans, berries, broccoli, brussels, canola, carrots, cauliflower, corn, cotton, cucumbers, ornamental plants, citrus, grapes, wheat, leafy vegetables, | <i>Botrytis</i> spp., <i>Fusarium</i> spp.,<br><i>Pythium</i> spp., <i>Rhizoctonia</i> spp.,<br><i>Thielaviopsis</i> spp.        |
| <b>T34 Biocontrol</b><br>(Asperello T34 Biocontrol)                                                                                                                                                                                                                                                      | <i>T. asperellum</i>                                          | T34                  | USA <sup>c</sup> ,<br>EU Members <sup>e</sup> | carnation plants growing in the greenhouse                                                                                                                               | <i>F. oxysporum</i> f.sp. <i>dianthi</i>                                                                                         |
| <b>Tanus</b>                                                                                                                                                                                                                                                                                             | <i>T. asperellum</i><br><i>T. harzianum</i>                   | URM 8120<br>URM 8119 | Brazil <sup>b</sup>                           | permitted for use on all crops                                                                                                                                           | <i>Rhizoctonia</i> spp., anthracnose disease                                                                                     |
| <b>Triatum DS</b>                                                                                                                                                                                                                                                                                        | <i>T. afroharzianum</i><br>(formerly<br><i>T. harzianum</i> ) | T-22                 | Brazil <sup>b</sup>                           | permitted for use on all crops                                                                                                                                           | <i>Macrophomina phaseolina</i> , <i>Sclerotinia sclerotiorum</i> , <i>Fusarium oxysporum</i> f.sp. <i>lycopersici</i>            |

Table S1. Continuation.

| Name of products                                                                                                                    | Species                                                       | Strain     | Registered in                             | Protected crops                           | Target pathogens                                                                                                                 |
|-------------------------------------------------------------------------------------------------------------------------------------|---------------------------------------------------------------|------------|-------------------------------------------|-------------------------------------------|----------------------------------------------------------------------------------------------------------------------------------|
| <b>Triatum G Biological Fungicide</b><br>(Triatum G, Triatum Granules Biological Fungicide, T-22 G Granules – Biological Fungicide) | <i>T. afroharzianum</i><br>(formerly<br><i>T. harzianum</i> ) | T-22       | USA <sup>c</sup>                          | permitted for use on all crops            | <i>Cylindrocladium</i> spp., <i>Fusarium</i> spp.,<br><i>Pythium</i> spp., <i>Rhizoctonia</i> spp.,<br><i>Thielaviopsis</i> spp. |
| <b>Triatum Technical</b>                                                                                                            | <i>T. afroharzianum</i><br>(formerly<br><i>T. harzianum</i> ) | T-22       | USA <sup>c</sup>                          | permitted for use on all crops            | <i>Rhizoctonia solani</i> , <i>Fusarium</i> spp.,<br><i>Pythium</i> spp.                                                         |
| <b>Triatum WG Biological Fungicide</b><br>(Triatum P Biological Fungicide)                                                          | <i>T. afroharzianum</i><br>(formerly<br><i>T. harzianum</i> ) | T-22       | USA <sup>c</sup> ,<br>Brazil <sup>b</sup> | permitted for use on all crops            | <i>Fusarium</i> spp., <i>Rhizoctonia</i> spp.,<br><i>Pythium</i> spp., <i>Thielaviopsis</i> spp.                                 |
| <b>Triatum P</b>                                                                                                                    | <i>T. atrobrunneum</i>                                        | ITEM 908   | EU Members <sup>e</sup>                   | tomato                                    | <i>Pythium</i> spp., <i>Rhizoctonia</i> spp.,<br><i>Fusarium</i> spp.                                                            |
| <b>Tricho Plus Biofungicide</b>                                                                                                     | <i>T. asperelloides</i>                                       | JM41R      | USA <sup>c</sup>                          | greenhouse plant beds, irrigation systems | <i>Fusarium</i> spp., <i>Phytophthora</i> spp.,<br><i>Pythium</i> spp., <i>Rhizoctonia</i> spp.,<br><i>Sclerotinia</i> spp.      |
| <b>Trichoderma harzianum WP</b>                                                                                                     | <i>T. harzianum</i>                                           |            | Chile <sup>d</sup>                        | permitted for use on all crops            | <i>Botrytis cinerea</i> , <i>Phytophthora</i> spp.                                                                               |
| <b>Trichodermax EC</b>                                                                                                              | <i>T. asperellum</i>                                          | T-211      | Brazil <sup>b</sup>                       | soybean, beans                            | <i>Fusarium solani</i> f.sp. <i>glycines</i> ,<br><i>Rhizoctonia solani</i> , <i>Sclerotinia</i><br><i>sclerotiorum</i>          |
| <b>Trichodermil SC 1306</b>                                                                                                         | <i>T. harzianum</i>                                           | ESALQ-1306 | Brazil <sup>b</sup>                       | beans, strawberry, soybean                | <i>Fusarium solani</i> f.sp. <i>phaseoli</i> ,<br><i>Rhizoctonia solani</i> , <i>Sclerotinia</i><br><i>sclerotiorum</i>          |
| <b>Trichodermil Super SC 1306</b>                                                                                                   | <i>T. harzianum</i>                                           | ESALQ-1306 | Brazil <sup>b</sup>                       | beans, strawberry, soybean                | <i>Fusarium solani</i> f.sp. <i>phaseoli</i> ,<br><i>Rhizoctonia solani</i> , <i>Sclerotinia</i><br><i>sclerotiorum</i>          |
| <b>Tricho-Guard</b>                                                                                                                 | <i>T. asperellum</i>                                          | BV-10      | Brazil <sup>b</sup>                       | permitted for use on all crops            | <i>Rhizoctonia</i> spp.                                                                                                          |
| <b>TrichoPlus®</b>                                                                                                                  | <i>T. fertile</i>                                             | JM4 1R     | Africa <sup>j</sup>                       | permitted for use on all crops            | <i>Rhizoctonia solani</i> , <i>Pythium</i> spp.,<br><i>Sclerotinia</i> spp., <i>Fusarium</i> spp.,<br><i>Phytophthora</i> spp.   |

Table S1. Continuation.

| Name of products                      | Species               | Strain    | Registered in                                     | Protected crops                                                                                   | Target pathogens                                                                                                                                                              |
|---------------------------------------|-----------------------|-----------|---------------------------------------------------|---------------------------------------------------------------------------------------------------|-------------------------------------------------------------------------------------------------------------------------------------------------------------------------------|
| <b>Trichosoil</b>                     | <i>T. harzianum</i>   |           | Uruguay <sup>k</sup>                              | garlic, pepper, lettuce, tomato, clove, roses                                                     | <i>Rhizoctonia</i> spp., <i>Pythium</i> spp., <i>Botrytis</i> spp.                                                                                                            |
| <b>Tricho-Turbo</b>                   | <i>T. asperellum</i>  | BV-10     | Brazil <sup>b</sup>                               | permitted for use on all crops                                                                    | <i>Rhizoctonia</i> spp.                                                                                                                                                       |
| <b>Tric-O</b>                         | <i>T. harzianum</i>   |           | Chile <sup>d</sup>                                | permitted for use on all crops                                                                    | <i>Alternaria</i> spp., <i>Botrytis cinerea</i> , <i>Cladosporium</i> spp., <i>Fusarium</i> spp., <i>Geotrichum candidum</i> , <i>Venturia</i> spp.                           |
| <b>Tricovab</b>                       | <i>T. stromaticum</i> |           | Brazil <sup>b</sup>                               | cocoa trees                                                                                       | <i>Moniliophthora perniciosa</i>                                                                                                                                              |
| <b>Tri-Soil</b>                       | <i>T. atroviride</i>  | I-1237    | France <sup>l</sup>                               | carrot, lettuce, potato, ornamentals                                                              | <i>Pythium</i> sp., <i>Rhizoctonia solani</i>                                                                                                                                 |
| <b>Tritter</b>                        | <i>T. harzianum</i>   |           | Brazil <sup>b</sup>                               | permitted for use on all crops                                                                    | <i>Rhizoctonia solani</i> , <i>Sclerotinia sclerotiorum</i>                                                                                                                   |
| <b>Trychonyd FR25</b>                 | <i>T. harzianum</i>   | CCT 6550  | Brazil <sup>b</sup>                               | permitted for use on all crops                                                                    | <i>Sclerotinia sclerotiorum</i>                                                                                                                                               |
| <b>Tusal</b>                          | <i>T. asperellum</i>  | T25       | EU Members <sup>e</sup>                           | tomato, pepper, cucumber, courgetti                                                               | <i>Phytophthora</i> spp., <i>Fusarium</i> spp., <i>Rhizoctonia solani</i> , <i>Pythium</i> spp., <i>Sclerotinia sclerotiorum</i>                                              |
| <b>Unite</b>                          | <i>T. atroviride</i>  |           | New Zealand <sup>g</sup>                          | organic and conventional crops, orchards, vineyards, cropping and outdoor vegetables, woody trees | <i>Pythium</i> spp., <i>Rhizoctonia</i> spp., <i>Phytophthora</i> spp., <i>Cylindrocarpon</i> spp.                                                                            |
| <b>Vinevax Bio-dowel</b>              | <i>T. atroviride</i>  | 5 strains | New Zealand <sup>g</sup> , Australia <sup>h</sup> | grapevines, fruit trees                                                                           | <i>Eutypa lata</i> , <i>Botryosphaeria stevensii</i> , <i>Chondrostereum purpureum</i>                                                                                        |
| <b>Vinevax Pruning Wound Dressing</b> | <i>T. atroviride</i>  | 5 strains | New Zealand <sup>g</sup> , Australia <sup>h</sup> | pip and stone fruit trees, ornamental trees, shrubs, grapevines                                   | <i>Eutypa lata</i> , <i>Botryosphaeria</i> spp., <i>Phaeomoniella chlamydospora</i>                                                                                           |
| <b>Vintec</b>                         | <i>T. atroviride</i>  | SC1       | USA <sup>c</sup> , EU Members <sup>e</sup>        | grapevines (ornamental, nursery), almonds (dormant application)                                   | <i>Phaeomoniella chlamydospora</i> , <i>Phaeoacremonium aleophilum</i> , <i>Diplodia seriata</i> , <i>Eutypa lata</i> , <i>Eutypa armenicae</i> , <i>Botryosphaeria ribis</i> |
| <b>Virisan</b>                        | <i>T. asperellum</i>  | TV1       | EU Members <sup>e</sup>                           | tomato (greenhouse, professional)                                                                 | <i>Pythium</i> spp., <i>Rhizoctonia</i> spp., <i>Phytophthora</i> spp., <i>Phoma</i> spp., <i>Verticillium</i> spp., <i>Fusarium</i> spp.                                     |

**Table S1.** Continuation.

| Name of products | Species                                                       | Strain | Registered in       | Protected crops                        | Target pathogens                                                                      |
|------------------|---------------------------------------------------------------|--------|---------------------|----------------------------------------|---------------------------------------------------------------------------------------|
| <b>Walker</b>    | <i>T. afroharzianum</i><br>(formerly<br><i>T. harzianum</i> ) | T-22   | Brazil <sup>b</sup> | permitted for use on all crops         | <i>F. oxysporum</i> f.sp. <i>lycopersici</i> ,<br><i>Sclerotinia sclerotiorum</i>     |
| <b>Xilon WP</b>  | <i>T. asperellum</i>                                          | T34    | Poland <sup>m</sup> | tomato, pepper, cloves,<br>ornamentals | <i>F. oxysporum</i> f.sp. <i>dianthi</i> , <i>Pythium</i> sp.,<br><i>Dianthus</i> sp. |

<sup>a</sup> These biological products have been registered for use in India by Central Insecticide Board and Registration Committee of the Government of India (Available online: <http://ppqs.gov.in/divisions/cib-rc/bio-pesticide-registrant>; <https://bioprotectionportal.com/india>; accessed on 24 January 2022)

<sup>b</sup> These biological products have been registered for use in Brazil by the Ministério da Agricultura, Pecuária e Abastecimento (Available online: <https://www.gov.br/agricultura/pt-br/>; <https://bioprotectionportal.com/brazil>; accessed on 24 January 2022)

<sup>c</sup> These biological products have been registered for use in USA by the United States Environmental Protection Agency (EPA) (Available online: <https://www.epa.gov/ingredients-used-pesticide-products/biopesticide-active-ingredients>; accessed on 24 January 2022)

<sup>d</sup> These biological products have been registered for use in Chile by Servicio Agrícola y Ganadero (Available online: <https://www.sag.gob.cl/>; <https://bioprotectionportal.com/chile>; accessed on 24 January 2022)

<sup>e</sup> These biological products have been registered for use in Member States of the European Union by the European Commission (Available online: [https://ec.europa.eu/food/plants/pesticides/eu-pesticides-database\\_en](https://ec.europa.eu/food/plants/pesticides/eu-pesticides-database_en); accessed on 24 January 2022)

<sup>f</sup> These biological products have been registered for use in Canada by the Canadian Food and Inspection Agency (CFIA) or Health Canada (Available online: <https://inspection.canada.ca/eng/1297964599443/1297965645317/>; <https://www.canada.ca/en/health-canada.html>; accessed on 24 January 2022)

<sup>g</sup> These biological products have been registered for use in New Zealand by the Ministry for Primary Industries (Available online: <https://eatsafe.nzfsa.govt.nz/web/public/acvm-register>; <http://agrimm.co.nz/new-zealand/>; accessed on 24 January 2022)

<sup>h</sup> These biological products have been registered for use in Australia by the New South Wales Environment Protection Authority (EPA) (Available online: <https://www.epa.nsw.gov.au/>; <https://services.apvma.gov.au/Pubcris>; <http://agrimm.co.nz/australia/>; accessed on 24 January 2022)

<sup>i</sup> This biological product has been registered for use in Uganda by the Ministry of Agriculture, Animal Industry and Fisheries (MAAIF) of Uganda (Available online: <https://www.agriculture.go.ug/>; <https://realipm.com/products/mazao-sustain/>; accessed on 24 January 2022)

<sup>j</sup> This biological product has been registered for use in Africa by the Department of Agriculture, Land Reform and Rural Development (DALRRD) (Available online: <https://www.agro.basf.co.za/en/Products/Overview/Fungicide/TrichoPlus.html>; accessed on 24 January 2022)

<sup>k</sup> This biological product has been registered for use in Uruguay (Available online: <https://www.lageycia.com/en/producto.php/32>; accessed on 24 January 2022)

<sup>l</sup> This biological product has been registered for use in France (Available online: <https://ephy.anses.fr/ppp/tri-soil>; accessed on 24 January 2022)

<sup>m</sup> This biological product has been registered for use in Poland by the Ministry of Agriculture and Rural Development (Available online: <https://www.gov.pl/web/rolnictwo/wyszukiwarka-srodkow-ochrony-roslin---zastosowanie>; accessed on 24 January 2022)
